# Supplementary material for: Chemical composition and in-vitro antioxidant and antimicrobial activity of the essential oil of Citrus aurantifolia L. leaves grown in Eastern Oman
Source: PubMed Central journal article supplement — J Taibah Univ Med Sci. 2018 Feb 3;13(2):108–12. doi: 10.1016/j.jtumed.2017.12.002 (PMC6694922; doi:10.1016/j.jtumed.2017.12.002), 2018-02-03
Supplement: mmc1.pdf [file mmc1.pdf]

**Supplementary material**

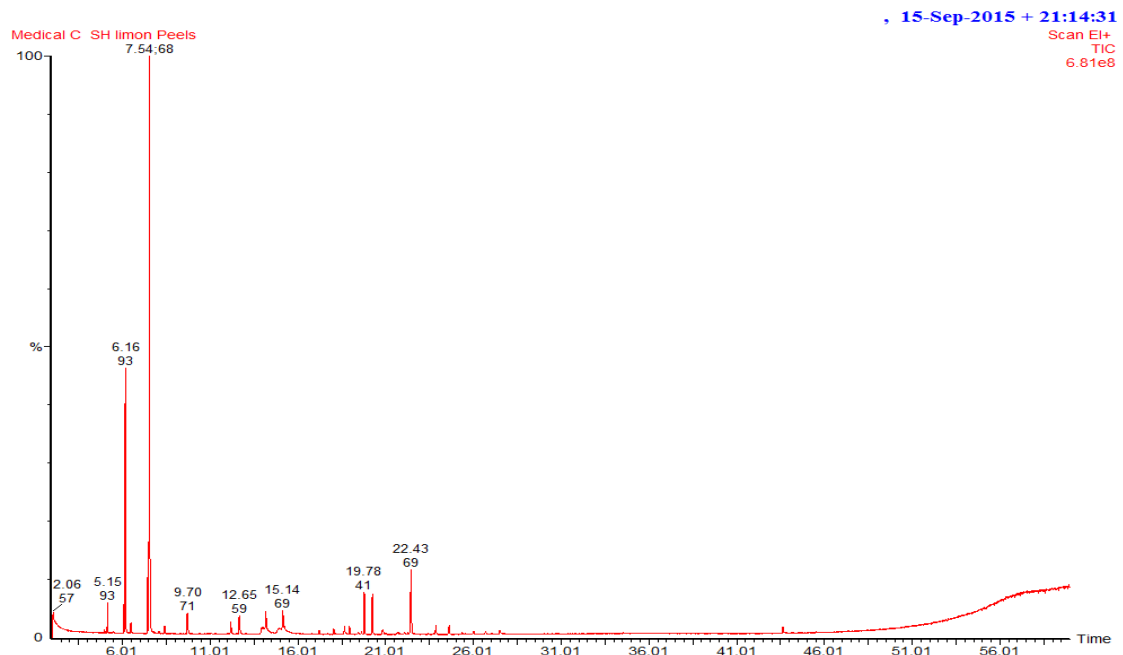

**Figure 1:** GC Chromatogram of essential oil of *Citrus aurantifolia* (L). Swingle leaves

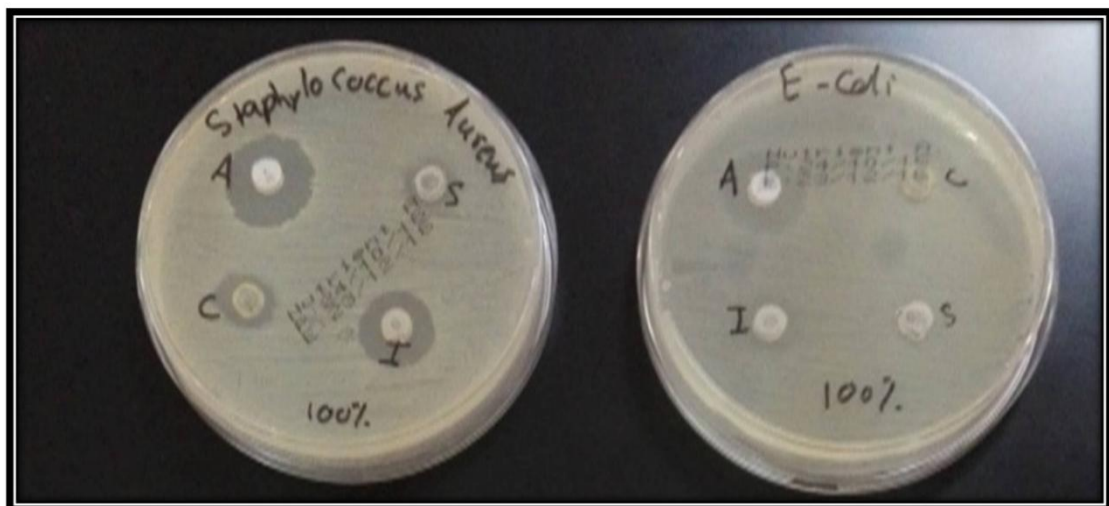

**Figure 2:** Antibacterial activity of *Citrus aurantifolia* essential oil (10 µl) against *S. aureus* and *E. coli*.
